# Supplementary material for: Identification and Comparison of Colletotrichum Secreted Effector Candidates Reveal Two Independent Lineages Pathogenic to Soybean
Source: Preprints.org preprint supplement (doi:10.20944/preprints202110.0287.v1), 2021-10-20
Supplement: Supplementary file 1 [file Table S1.xlsx]

## Sheet: C. musicola
GeneID	BLAST	EffectorP 2.0	Tandem repeats	Lenght (a.a.)	Mol. weight (kdA)	% of cisteynes	Subcellular localization	Apoplast	Orthogroup	PFAM	IPRO	GO	PHI-Base
CMUS01_05796	C. orchidearum specific	-	Yes	232	23.894	0	-	-	OG0014562	No	No	No	No
CMUS01_06435	C. orchidearum specific	-	Yes	185	20.05	0	-	-	OG0014587	No	No	No	No
CMUS01_11399	C. orchidearum specific	-	-	156	15.289	0	-	Yes	OG0014819	No	No	No	No
CMUS01_14944	C. orchidearum specific	Yes	-	75	7.719	0	-	Yes	OG0014984	No	No	No	No
CMUS01_09629	C. orchidearum specific	-	Yes	448	48.511	0.2	-	-	OG0014733	No	No	No	No
CMUS01_11524	C. orchidearum specific	Yes	Yes	96	9.464	1	-	Yes	OG0014823	No	No	No	No
CMUS01_04008	C. orchidearum specific	-	-	123	13.34	2.4	-	-	OG0014481	No	No	No	No
CMUS01_11539	C. orchidearum specific	-	Yes	129	12.143	3.1	-	Yes	OG0014824	No	No	No	No
CMUS01_06820	C. orchidearum specific	Yes	-	179	19.72	3.4	-	Yes	OG0014599	No	No	No	No
CMUS01_05086	C. orchidearum specific	Yes	-	117	12.123	6.8	-	Yes	OG0014526	No	No	No	No
CMUS01_13948	C. orchidearum specific	Yes	-	86	8.812	7	-	Yes	OG0014942	No	No	No	No
CMUS01_13947	C. orchidearum specific	Yes	-	85	8.925	7.1	-	Yes	OG0014941	No	No	No	No
CMUS01_02809	C. orchidearum specific	-	-	77	7.703	7.8	-	Yes	OG0014439	No	No	No	No
CMUS01_13216	Species-specific	-	Yes	84	8.948	0	-	Yes	OG0023127	No	No	No	No
CMUS01_15804	Species-specific	-	-	39	4.099	0	-	-	OG0023301	No	No	No	No
CMUS01_14394	Species-specific	-	-	143	15.053	0.7	-	-	OG0023201	No	No	No	No
CMUS01_04275	Species-specific	-	-	90	9.131	1.1	-	-	OG0022568	No	No	No	No
CMUS01_09803	Species-specific	Yes	-	131	14.278	1.5	-	Yes	OG0022901	No	No	No	No
CMUS01_14349	Species-specific	-	-	131	14.316	1.5	-	-	OG0023199	No	No	No	No
CMUS01_09430	Species-specific	-	Yes	110	11.497	1.8	-	-	OG0022867	No	No	No	No
CMUS01_07042	Species-specific	Yes	-	234	25.95	2	-	-	OG0022750	No	No	No	No
CMUS01_04271	Species-specific	-	-	159	17.127	3.1	Chloroplast	-	OG0022565	No	No	No	No
CMUS01_03684	Species-specific	-	-	81	8.735	3.7	-	-	OG0022524	No	No	No	No
CMUS01_03859	Species-specific	Yes	-	108	11.373	3.7	-	-	OG0022534	No	No	No	No
CMUS01_11365	Species-specific	Yes	-	122	14.053	4.1	-	-	OG0023016	No	No	No	No
CMUS01_01303	Species-specific	-	-	283	30.201	4.2	Chloroplast	-	-	No	No	No	No
CMUS01_06715	Species-specific	-	-	70	6.933	4.3	-	Yes	OG0022730	No	No	No	No
CMUS01_05231	Species-specific	Yes	-	68	6.989	11.8	-	Yes	OG0022631	No	No	No	No

## Sheet: C. plurivorum
GeneID	BLAST	EffectorP 2.0	Tandem repeats	Lenght (a.a.)	Mol. weight (kdA)	% of cisteynes	Subcellular localization	Apoplast	Orthogroup	PFAM	IPRO	GO	Phi-base
CPLU01_04300	C. orchidearum specific	-	Yes	226	23.279	0	-	-	OG0014562	No	No	No	No
CPLU01_10047	C. orchidearum specific	Yes	-	71	7.267	0	-	Yes	OG0014984	No	No	No	No
CPLU01_12757	C. orchidearum specific	-	Yes	194	21.018	0	-	-	OG0014587	No	No	No	No
CPLU01_13748	C. orchidearum specific	-	Yes	198	19.388	0	-	Yes	OG0014819	No	No	No	No
CPLU01_06231	C. orchidearum specific	-	-	576	62.9	0.2	Nucleus	-	OG0014733	No	No	No	No
CPLU01_09347	C. orchidearum specific	-	Yes	126	12.129	3.2	-	Yes	OG0014824	No	No	No	No
CPLU01_12854	C. orchidearum specific	Yes	-	141	15.14	4.3	-	-	OG0014599	No	No	No	No
CPLU01_11912	C. orchidearum specific	Yes	Yes	117	12.319	6.8	-	Yes	OG0014526	No	No	No	No
CPLU01_08816	C. orchidearum specific	Yes	-	86	8.858	7	-	Yes	OG0014942	No	No	No	No
CPLU01_08815	C. orchidearum specific	Yes	-	85	8.859	7.1	-	Yes	OG0014941	No	No	No	No
CPLU01_14227	C. orchidearum specific	-	-	77	7.737	7.8	-	Yes	OG0014439	No	No	No	No
CPLU01_10072	Species-specific	-	-	68	7.235	0	-	-	OG0027269	No	No	No	No
CPLU01_12177	Species-specific	-	-	165	17.828	0.6	Chloroplast	-	OG0027338	No	No	No	No
CPLU01_05972	Species-specific	-	-	235	25.929	0.9	Chloroplast	-	OG0027064	No	No	No	No
CPLU01_09167	Species-specific	-	-	79	8.247	1.3	-	-	OG0027222	No	No	No	No
CPLU01_12778	Species-specific	Yes	-	148	15.907	2	Chloroplast	-	OG0027383	No	No	No	No
CPLU01_02254	Species-specific	-	-	190	19.903	2.1	Chloroplast	-	OG0026898	No	No	No	No
CPLU01_03023	Species-specific	Yes	-	140	15.18	2.1	-	-	OG0026942	No	No	No	No
CPLU01_15430	Species-specific	-	-	67	6.627	4.5	-	Yes	OG0027496	No	No	No	No

## Sheet: C. sojae
GeneID	BLAST	EffectorP 2.0	Tandem repeats	Lenght (a.a.)	Mol. weight (kdA)	% of cisteynes	Subcellular localization	Apoplast	Orthogroup	PFAM	IPRO	GO	PHI-base
CSOJ01_02292	C. orchidearum specific	-	Yes	240	24.91	0	-	-	OG0014562	No	No	No	No
CSOJ01_11132	C. orchidearum specific	-	-	168	18.205	0	-	-	OG0014587	No	No	No	No
CSOJ01_11943	C. orchidearum specific	-	-	71	7.268	0	-	Yes	OG0014984	No	No	No	No
CSOJ01_14785	C. orchidearum specific	-	-	532	57.947	0.2	Nucleus	-	OG0014733	No	No	No	No
CSOJ01_05277	C. orchidearum specific	-	Yes	155	16.308	0.6	-	-	OG0014748	No	No	No	No
CSOJ01_06508	C. orchidearum specific	-	-	263	28.723	1.1	Nucleus	-	OG0014480	No	No	No	No
CSOJ01_09256	C. orchidearum specific	-	Yes	274	27.495	1.5	Chloroplast	Yes	-	No	No	No	No
CSOJ01_08820	C. orchidearum specific	-	-	436	47.742	1.8	Chloroplast/mitochondria	-	OG0014948	No	No	No	No
CSOJ01_07932	C. orchidearum specific	-	-	243	26.936	3.3	-	-	OG0015056	No	No	No	No
CSOJ01_09501	C. orchidearum specific	-	-	123	11.831	3.3	-	Yes	OG0014824	No	No	No	No
CSOJ01_05688	C. orchidearum specific	Yes	-	137	14.811	4.4	-	-	OG0014599	No	No	No	No
CSOJ01_10279	C. orchidearum specific	Yes	-	113	11.611	6.2	-	Yes	OG0014526	No	No	No	No
CSOJ01_09129	C. orchidearum specific	Yes	-	86	8.856	7	-	Yes	OG0014942	No	No	No	No
CSOJ01_09130	C. orchidearum specific	Yes	-	85	8.885	7.1	-	Yes	OG0014941	No	No	No	No
CSOJ01_15809	C. orchidearum specific	-	-	77	7.717	7.8	-	Yes	OG0014439	No	No	No	No
CSOJ01_01718	C. orchidearum specific	Yes	-	97	9.899	10.3	-	Yes	OG0013588	No	No	No	No
CSOJ01_08358	Species-specific	-	-	96	10.711	0	-	-	OG0028038	No	No	No	No
CSOJ01_13469	Species-specific	-	Yes	108	11.886	0	-	Yes	OG0028327	No	No	No	No
CSOJ01_02886	Species-specific	-	-	294	32.555	1.7	Mitochondria/nucleus	-	OG0027709	No	No	No	No
CSOJ01_03097	Species-specific	-	Yes	100	10.364	2	-	-	OG0027727	No	No	No	No
CSOJ01_07714	Species-specific	-	-	88	9.49	2.3	-	-	OG0027995	No	No	No	No
CSOJ01_04860	Species-specific	Yes	-	74	7.921	2.7	-	-	OG0027822	No	No	No	No
CSOJ01_00179	Species-specific	-	-	72	7.612	2.8	-	-	OG0027559	No	No	No	No
CSOJ01_10965	Species-specific	Yes	-	96	10.271	5.2	-	-	OG0028170	No	No	No	No
CSOJ01_07468	Species-specific	Yes	-	82	8.522	12.2	-	Yes	OG0027980	No	No	No	No

## Sheet: C. truncatum
															Trimmed mean of M-values (TMM) normalization method
															0 hpi - Resistant			0 hpi - Susceptible			12 hpi - Resistant			12 hpi - Susceptible			48 hpi - Resistant			48 hpi - Suceptible			120 hpi - Resistant			120 hpi - Suceptible			Liquid Culture				Comparison with 18 aditional C. truncatum genomes (Present/Absent)
GeneID	BLAST	EffectorP 2.0	Tandem repeats	Lenght (a.a.)	Mol. weight (kdA)	% of cisteynes	Subcellular localization	Apoplast	Orthogroup	PFAM	IPRO	GO	PHI-base	RNA evidence	4-1	4-2	4-3	5-1	5-2	5-3	10-1	10-2	10-3	11-1	11-2	11-3	16-1	16-2	16-3	17-1	17-2	17-3	22-1	22-2	22-3	23-1	23-2	23-3	59-1	59-2	59-3	Evolutionary evidence	GO2-03	GO2-06	GO2-12	GO4-07	GO4-08	GO4-17	GO5-11
CTRU02_00830	Species-specific	Yes	-	131	14.304	2.3	-	-	OG0030959	No	No	No	No	No	0	0	0	0	0	0	0	0	0	0	0	0	0	0	0	0	0	0	0	0	0	0	0	0	0	0	0	Yes	Present	Present	Present	Present	Present	Present	Present
CTRU02_05841	Species-specific	-	-	119	13.202	0	-	-	OG0031355	No	No	No	No	Yes	0	0	0	0	0	0	0	0	0	0	0	0	0	0	0	0	0	0	13.6816	0	0	0	0	0	4.43341	6.43982	5.69014	Yes	Present	Present	Present	Present	Present	Present	Present
CTRU02_00831	Species-specific	-	Yes	549	59.415	1.6	Mit-Chlo	-	OG0030960	No	No	No	No	Yes	0	0	0	0	0	0	0	0	0	0	0	0	0	0	0	0	0	0	0	0	0	22.5913	0	10.6867	18.3382	14.8611	10.5674	Yes	Present	Present	Present	Present	Present	Present	Present
CTRU02_13901	Species-specific	-	Yes	151	15.386	0	-	-	OG0031879	No	No	No	No	Yes	0	0	0	0	292.484	0	0	0	0	0	0	0	0	0	0	0	0	0	0	0	0	0	0	0	0.201519	0	0	No	Present	Present	Present	Present	Present	Present	Present
CTRU02_07028	Species-specific	-	-	108	11.908	0.9	-	-	OG0031438	No	No	No	No	Yes	0	0	0	0	0	0	0	0	0	0	0	0	0	0	0	0	0	0	13.6816	5.24954	0	15.6401	41.8272	5.34333	7.05316	6.19214	6.09658	Yes	Present	Present	Present	Present	Present	Present	Present
CTRU02_05072	Species-specific	-	-	71	8.002	1.4	-	-	OG0031268	No	No	No	No	No	0	0	0	0	0	0	0	0	0	0	0	0	0	0	0	0	0	0	0	0	0	0	0	0	0	0	0	Yes	Present	Present	Present	Present	Present	Present	Present
CTRU02_09174	Species-specific	Yes	-	69	7.416	1.4	-	-	OG0031556	No	No	No	No	No	0	0	0	0	0	0	0	0	0	0	0	0	0	0	0	0	0	0	0	0	0	0	0	0	0	0	0	Yes	Present	Present	Present	Present	Present	Present	Present
CTRU02_00942	Species-specific	-	-	258	28.068	2.3	Nucleus	-	OG0030967	No	No	No	No	No	0	0	0	0	0	0	0	0	0	0	0	0	0	0	0	0	0	0	0	0	0	0	0	0	0	0	0	No	Absent	Absent	Absent	Absent	Absent	Absent	Absent
CTRU02_02414	Species-specific	-	-	85	9.306	0	-	-	OG0031076	No	No	No	No	No	0	0	0	0	0	0	0	0	0	0	0	0	0	0	0	0	0	0	0	0	0	0	0	0	0	0	0	No	Absent	Present	Absent	Absent	Absent	Absent	Absent
CTRU02_02635	Species-specific	Yes	-	79	7.991	7.6	-	Yes	OG0031095	No	No	No	No	No	0	0	0	0	0	0	0	0	0	0	0	0	0	0	0	0	0	0	0	0	0	0	0	0	0	0	0	Yes	Present	Present	Present	Present	Present	Present	Present
CTRU02_04831	Species-specific	Yes	-	52	5.747	5.8	-	Yes	OG0031248	No	No	No	No	No	0	0	0	0	0	0	0	0	0	0	0	0	0	0	0	0	0	0	0	0	0	0	0	0	0	0	0	No	Absent	Absent	Absent	Absent	Present	Absent	Present
CTRU02_09022	Species-specific	-	-	87	9.037	2.3	-	-	OG0031552	No	No	No	No	No	0	0	0	0	0	0	0	0	0	0	0	0	0	0	0	0	0	0	0	0	0	0	0	0	0	0	0	No	Absent	Absent	Absent	Absent	Present	Absent	Present
CTRU02_04889	Species-specific	-	-	48	5.234	2.1	-	-	OG0031252	No	No	No	No	Yes	0	0	0	0	0	0	0	0	0	0	0	0	0	0	0	0	0	0	0	0	0	10.4267	16.7309	0	3.42582	5.44908	5.08048	No	Absent	Present	Present	Present	Present	Present	Present
CTRU02_05528	Species-specific	-	-	99	10.855	2	-	-	OG0031319	No	No	No	No	Yes	0	0	0	0	0	0	0	0	0	0	0	0	0	0	0	0	0	0	0	20.9982	0	0	0	0	2.21671	4.45834	4.87727	Yes	Present	Present	Present	Present	Present	Present	Present
CTRU02_06815	Species-specific	-	-	120	12.315	1.7	-	-	OG0031429	No	No	No	No	No	0	0	0	0	0	0	0	0	0	0	0	0	0	0	0	0	0	0	0	0	0	0	0	0	0	0	0	No	Absent	Absent	Present	Absent	Present	Absent	Present
CTRU02_08110	Species-specific	Yes	-	164	18.212	6.1	-	-	OG0031506	No	No	No	No	No	0	0	0	0	0	0	0	0	0	0	0	0	0	0	0	0	0	0	0	0	0	0	0	0	0	0	0	No	Absent	Absent	Absent	Absent	Absent	Absent	Absent
CTRU02_07468	Species-specific	Yes	-	90	9.561	8.9	-	Yes	OG0031469	No	No	No	No	Yes	79.7779	0	0	0	365.605	0	0	0	0	0	0	0	0	0	0	0	0	0	0	10.4991	0	5.21337	0	10.6867	0.403037	1.23843	2.23541	No	Present	Present	Present	Present	Present	Present	Present
CTRU02_13132	Species-specific	Yes	-	120	13.218	7.5	-	-	OG0031827	No	No	No	No	Yes	0	0	0	0	0	0	0	0	0	0	0	0	0	0	0	0	0	0	3.4204	0	12.6345	0	0	0	0.604556	0.495371	0.812878	No	Present	Absent	Present	Absent	Present	Absent	Present
CTRU02_08935	Species-specific	-	-	146	16.718	4.1	Chloroplast	-	OG0031544	No	No	No	No	Yes	0	0	0	0	0	0	0	0	0	0	0	0	0	0	0	0	0	0	0	26.2477	0	0	0	5.34333	5.44101	4.95371	3.04829	Yes	Present	Present	Present	Present	Present	Present	Present
CTRU02_09190	Species-specific	Yes	-	80	8.944	7.5	-	Yes	OG0031557	No	No	No	No	Yes	0	0	0	0	0	0	0	0	0	0	0	0	0	0	0	0	0	0	0	0	0	5.21337	0	10.6867	0	0	4.47083	Yes	Present	Present	Present	Present	Present	Present	Present
CTRU02_14662	Species-specific	-	Yes	173	18.514	0.6	Nucleus	-	-	No	No	No	No	No	0	0	0	0	0	0	0	0	0	0	0	0	0	0	0	0	0	0	0	0	0	0	0	0	0	0	0	No	Absent	Absent	Absent	Absent	Absent	Absent	Absent
CTRU02_15496	Species-specific	-	Yes	173	18.514	0.6	Nucleus	-	-	No	No	No	No	Yes	0	0	0	227.597	0	0	0	0	0	0	0	0	0	0	0	0	0	0	13.6816	31.4972	50.5378	133.81	0	0	2.21671	0.990742	0	Yes	Present	Present	Present	Present	Present	Present	Present
CTRU02_10342	Species-specific	Yes	-	77	8.507	6.5	-	-	OG0031637	No	No	No	No	Yes	0	0	0	0	0	0	0	0	0	0	0	0	0	0	0	199.597	0	0	177.861	0	530.647	234.602	276.06	299.226	0	12.8796	7.3159	No	Absent	Absent	Present	Absent	Present	Absent	Present
CTRU02_10581	Species-specific	Yes	-	170	18.701	3.5	-	-	OG0031657	No	No	No	No	No	0	0	0	0	0	0	0	0	0	0	0	0	0	0	0	0	0	0	0	0	0	0	0	0	0	0	0	No	Present	Absent	Present	Absent	Present	Present	Present
CTRU02_13374	Species-specific	-	-	77	8.08	0	-	Yes	OG0031846	No	No	No	No	No	0	0	0	0	0	0	0	0	0	0	0	0	0	0	0	0	0	0	0	0	0	0	0	0	0	0	0	No	Present	Present	Absent	Present	Absent	Present	Present
CTRU02_12587	Species-specific	-	Yes	196	19.922	0	-	Yes	-	No	No	No	No	Yes	0	0	157.504	0	0	0	0	0	0	0	0	0	0	0	0	0	0	149.581	41.0449	15.7486	37.9034	31.2802	0	0	130.786	148.611	233.296	Yes	Present	Present	Present	Present	Present	Present	Present
CTRU02_11978	Species-specific	-	Yes	308	32.681	0.6	-	Yes	OG0031757	No	No	No	No	Yes	0	0	0	0	0	0	0	0	0	81.4752	0	0	0	0	0	66.5323	0	0	0	0	0	6.95116	0	0	1.00759	0	2.43863	Yes	Present	Present	Present	Present	Present	Present	Present
CTRU02_11186	Species-specific	-	-	85	8.868	1.2	-	Yes	OG0031694	No	No	No	No	Yes	0	0	0	0	0	0	0	0	0	0	124.215	0	0	0	0	0	0	0	13.6816	0	0	6.95116	50.1927	0	19.7488	18.081	33.7344	No	Present	Absent	Present	Absent	Present	Present	Present
CTRU02_08233	Species-specific	Yes	-	78	8.632	1.3	-	Yes	-	No	No	No	No	No	0	0	0	0	0	0	0	0	0	0	0	0	0	0	0	0	0	0	0	0	0	0	0	0	0	0	0	Yes	Present	Present	Present	Present	Present	Present	Present
CTRU02_05538	Species-specific	-	-	53	5.58	1.9	-	Yes	OG0031320	No	No	No	No	Yes	0	0	0	0	0	0	0	0	0	0	0	0	0	0	0	0	0	0	78.6693	41.9963	12.6345	1.73779	16.7309	10.6867	0.806075	0	0	No	Absent	Absent	Absent	Absent	Absent	Absent	Absent
CTRU02_09640	Species-specific	-	-	48	4.786	4.2	-	Yes	OG0031584	No	No	No	No	No	0	0	0	0	0	0	0	0	0	0	0	0	0	0	0	0	0	0	0	0	0	0	0	0	0	0	0	Yes	Present	Present	Present	Present	Present	Present	Present
CTRU02_05045	Species-specific	-	Yes	70	7.095	4.3	-	Yes	OG0031265	No	No	No	No	Yes	0	0	0	0	0	0	0	0	0	0	0	0	0	0	0	0	0	0	17.102	0	25.2689	27.8046	0	21.3733	8.66531	2.22917	2.84507	No	Absent	Absent	Absent	Absent	Absent	Absent	Absent
CTRU02_11952	Species-specific	Yes	-	147	15.897	5.4	-	Yes	OG0031756	No	No	No	No	No	0	0	0	0	0	0	0	0	0	0	0	0	0	0	0	0	0	0	0	0	0	0	0	0	0	0	0	Yes	Present	Present	Present	Present	Present	Present	Present
CTRU02_13651	Species-specific	Yes	-	134	15.173	4.5	-	-	OG0031862	No	No	No	No	Yes	159.556	0	0	0	0	0	0	0	0	0	0	0	0	0	0	0	0	0	10.2612	0	0	17.3779	8.36545	10.6867	3.02278	4.21065	3.25151	No	Absent	Absent	Absent	Absent	Absent	Absent	Absent
CTRU02_13804	Species-specific	-	-	38	4.396	0	-	-	OG0031876	No	No	No	No	No	0	0	0	0	0	0	0	0	0	0	0	0	0	0	0	0	0	0	0	0	0	0	0	0	0	0	0	No	Absent	Absent	Absent	Absent	Absent	Absent	Absent
CTRU02_14087	Species-specific	Yes	-	75	7.695	12	-	Yes	OG0031886	No	No	No	No	No	0	0	0	0	0	0	0	0	0	0	0	0	0	0	0	0	0	0	0	0	0	0	0	0	0	0	0	Yes	Present	Present	Present	Present	Present	Present	Present
CTRU02_02134	Species-specific	Yes	-	87	9.287	8	-	Yes	OG0031056	No	No	No	No	No	0	0	0	0	0	0	0	0	0	0	0	0	0	0	0	0	0	0	0	0	0	0	0	0	0	0	0	No	Absent	Absent	Absent	Absent	Absent	Absent	Absent
CTRU02_14861	Species-specific	Yes	-	90	9.749	2.2	-	-	OG0031943	No	No	No	No	No	0	0	0	0	0	0	0	0	0	0	0	0	0	0	0	0	0	0	0	0	0	0	0	0	0	0	0	No	Absent	Absent	Absent	Absent	Absent	Absent	Absent
CTRU02_15750	Species-specific	-	-	219	23.553	0.9	Nucleus	-	OG0032015	No	No	No	No	No	0	0	0	0	0	0	0	0	0	0	0	0	0	0	0	0	0	0	0	0	0	0	0	0	0	0	0	No	Absent	Absent	Absent	Absent	Absent	Absent	Absent
CTRU02_11196	Species-specific	-	-	312	34.3	1.3	Nucleus	Yes	OG0031695	No	No	No	No	No	0	0	0	0	0	0	0	0	0	0	0	0	0	0	0	0	0	0	0	0	0	0	0	0	0	0	0	No	Present	Absent	Present	Absent	Present	Absent	Present
[truncated: 11 more columns]
