# Supplementary material for: Identification and Comparison of Colletotrichum Secreted Effector Candidates Reveal Two Independent Lineages Pathogenic to Soybean
Source: Preprints.org preprint supplement (doi:10.20944/preprints202110.0287.v1), 2021-10-20
Supplement: Supplementary file 2 [file supplementary]

***Colletotrichum* species  
Pathogenic to soybean**

Identification of  
secreted proteins

Non-secreted

***SignalP***

Secreted

Identification of  
TM domain /  
GPI anchors  
***THMMM / PredGPI***

TM / GPI

No TM / GPI

***SECs***

BLAST vs  
*Colletotrichum*

Hits

Shared

**- target**

No hits

BLAST vs  
soybean pathogenic

**- target**

Hits/No Hits

BLAST vs nr db

**-*Colletotrichum*  
-*Glomerella***

Hits

Conserved

No hits

***Host-specific*  
*Species-complex specific*  
*Species-specific***

***12 Colletotrichum  
genomes***

Clustering of proteins  
Based on similarity

***Orthofinder***
